# Supplementary material for: Disulfide-mediated conversion of 8-mer bowl-like protein architecture into three different nanocages
Source: PubMed Central journal article supplement (PMC6377661; doi:10.1038/s41467-019-08788-9), 2019-02-15
Supplement: 41467_2019_8788_MOESM1_ESM.pdf [file 41467_2019_8788_MOESM1_ESM.pdf]

## **Supplementary Information**

### **Disulfide-mediated conversion of 8-mer bowl-like protein architecture into three different nanocages**

Zang et al.

## Supplementary Figures

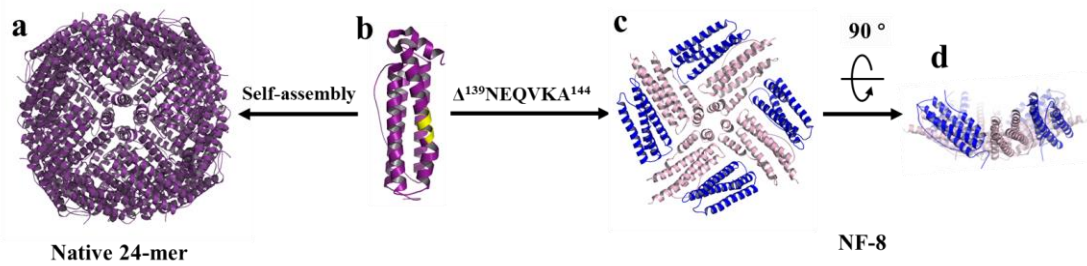

**Supplementary Figure 1. The construction of a bowl-like protein NF-8 from HuHF.** (a) Crystal structure of a tetraeicosameric recombinant HuHF (PDB ID: 2FHA), which is composed of 24 subunits. (b) Structure of HuHF subunit. Deletion of six amino acid residues (which have been highlighted in yellow) at D-helix located at the  $C_3$ - $C_4$  interface of native HuHF resulted in its complete conversion into a bowl-like 8-mer protein architecture (NF-8) in solution. (c) Top view of NF-8. (d) Side view of NF-8 which has a bowl-like structure.

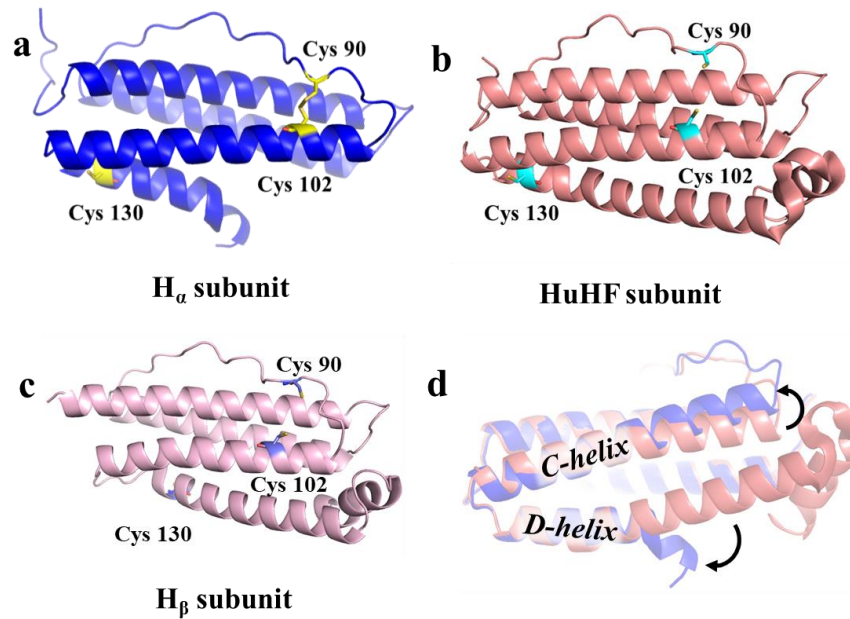

**Supplementary Figure 2. The crystal structure of HuHF and NF-8 subunits.** (a) NF-8 is composed of 4  $H_{\alpha}$  and 4  $H_{\beta}$  subunits. Each  $H_{\alpha}$  subunit consists of one intra-subunit S-S bond (yellow color) formed between Cys90 and Cys102. Cys130 is a single free cysteine which is also highlighted in yellow. (b) Each native ferritin subunit lacks such intra-subunit S-S bond and consists of 3 free cysteines. (c)  $H_{\beta}$  subunit is also devoid of such intra-subunit S-S bond, and contains 3 free cysteines. (d) Superposition of native H subunit (orange) and  $H_{\alpha}$  subunit (blue) revealed that the formation of the intra-subunit S-S bond resulted in movement of both D  $\alpha$ -helix and C  $\alpha$ -helix towards different directions.

```

      10      20      30      40      50      60      70
.....|.....|.....|.....|.....|.....|.....|.....|.....|
NF-8  TTASTSQVRQNYHQDSEAAINRQINLELYASYVYLSMSYYFDRDDVALKNFAKYFLHQSHHEEREHAEKLM
Δ3C   TTASTSQVRQNYHQDSEAAINRQINLELYASYVYLSMSYYFDRDDVALKNFAKYFLHQSHHEEREHAEKLM
∇C    TTASTSQVRQNYHQDSEAAINRQINLELYASYVYLSMSYYFDRDDVALKNFAKYFLHQSHHEEREHAEKLM
Δ3C-∇C TTASTSQVRQNYHQDSEAAINRQINLELYASYVYLSMSYYFDRDDVALKNFAKYFLHQSHHEEREHAEKLM

      80      90      100     110     120     130     140
.....|.....|.....|.....|.....|.....|.....|.....|.....|
NF-8  KLQNRGGRIFLQDIKKPDCDDWESGLNAMECALHLEKNVNQSLLLELHKLATDKNDPHLCDFIETHYLIK
Δ3C   KLQNRGGRIFLQDIKKPDADDWESGLNAMEAAALHLEKNVNQSLLLELHKLATDKNDPHIADFIETHYLIK
∇C    KLQNRGGRIFLQDIKKPDCDDWESGLNAMECALHLEKNVNQSLLLELHKLATDKNDPHLCDFIETHYLIK
Δ3C-∇C KLQNRGGRIFLQDIKKPDADDWESGLNAMEAAALHLEKNVNQSLLLELHKLATDKNDPHIADFIETHYLIK

      150     160     170
.....|.....|.....|.....|.....|.....|.....|.....|.....|
NF-8  ELGDHVTNLRKMGAPESGLAEYLFDKHTLGDSDNES
Δ3C   ELGDHVTNLRKMGAPESGLAEYLFDKHTLGDSDNES
∇C    ELGCHHVTNLRKMGAPESGLAEYLFDKHTLGDSDNES
Δ3C-∇C ELGCHHVTNLRKMGAPESGLAEYLFDKHTLGDSDNES

```

**Supplementary Figure 3. Complete amino acid sequences of NF-8 and its three mutants.**

Mutation sites for all three mutants have been highlighted in red box.

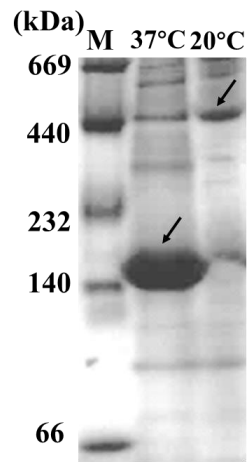

**Supplementary Figure 4. Native PAGE analyses of mutant  $\Delta 3C$ .** The main products were overexpressed at different temperatures. Source data are provided as a Source Data file.

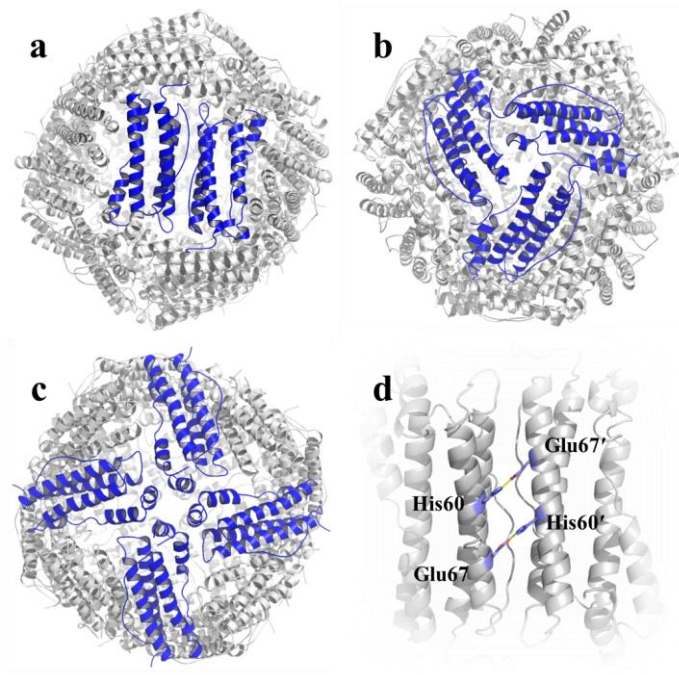

**Supplementary Figure 5. Crystal structure of 24-mer<sub>Δ3C</sub>.** View of 24-mer<sub>Δ3C</sub> crystal structure down the two fold (a), three-fold (b) and four-fold symmetry axes (c). The 24-mer<sub>Δ3C</sub> protein nanocage is a homopolymer which comprises 24 H<sub>7</sub> subunits. (d) The key contacts at C<sub>2</sub> interface of 24-mer<sub>Δ3C</sub> where two salt bridges are formed by His60 and Glu67, representing major interactions.

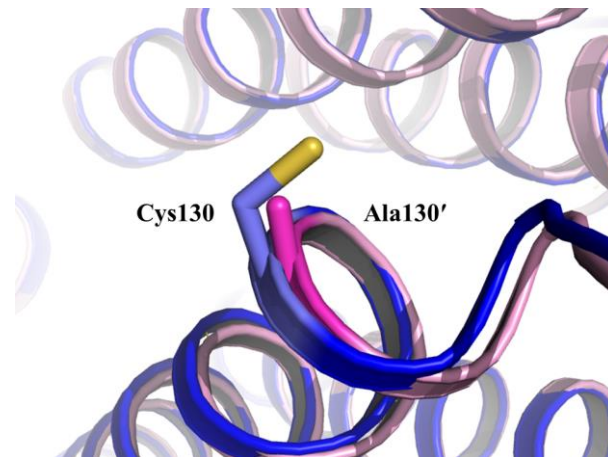

**Supplementary Figure 6. Structural comparison of NF-8 and 24-mer $\Delta_{3C}$ .** . NF-8 and 24-mer $\Delta_{3C}$  subunits were shown in blue and pink, respectively. Cys130 and Ala130' were highlighted.

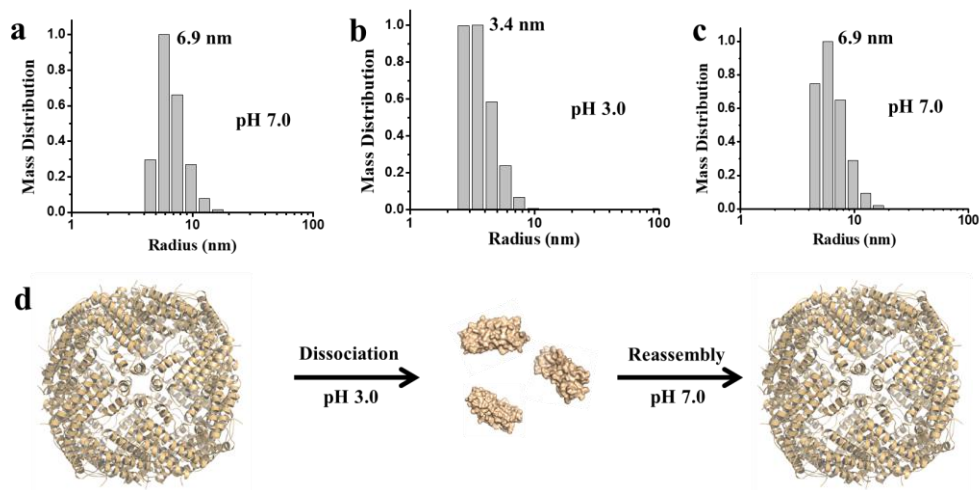

**Supplementary Figure 7. Disassembly and reassembly of 24-mer $\Delta_{3C}$  nanocage by pH.** (a) Dynamic light scattering (DLS) analyses of 24-mer $\Delta_{3C}$  nanocage at pH 7.0. There is one population with the hydrodynamic radius ( $R_H$ ) of 6.9 nm in solution. (b) At 3.0, the  $R_H$  of protein species in solution decreased to 3.4 nm due to protein nanocage disassembly into subunits. (c) When adjusting pH back to pH 7.0, the  $R_H$  of protein species in solution increased back to 6.9 nm due to subunit reassembly into protein nanocage. (d) Schematic description of disassembly and reassembly of the newly prepared 24-mer ferritin-like nanocage, 24-mer $\Delta_{3C}$ , controlled by pH.



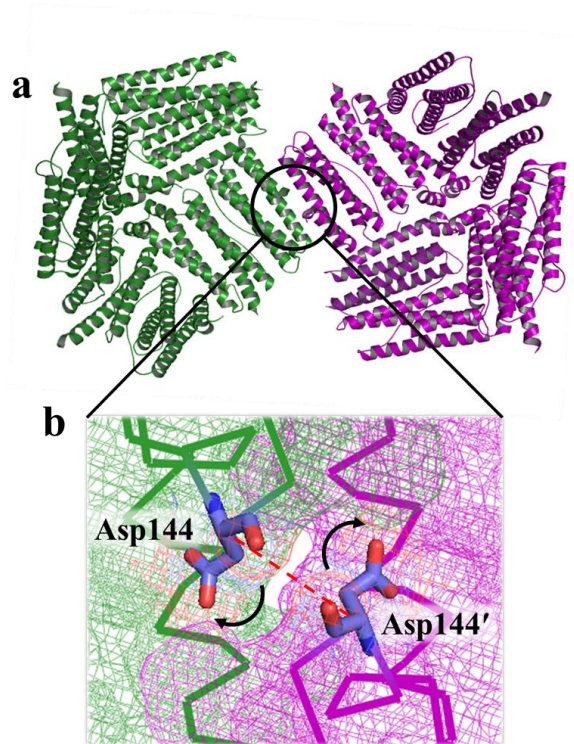

**Supplementary Figure 8. Packing pattern of two NF-8 molecules in crystal.** (a)  $H_{\alpha}$  subunits are directly involved in intermolecular interactions of two NF-8 molecules in crystal<sup>13</sup>. (b) There are electrostatic repulsive interactions from acidic residues Asp144 and Asp144' which are contributed from two  $H_{\alpha}$  subunits<sup>13</sup>.

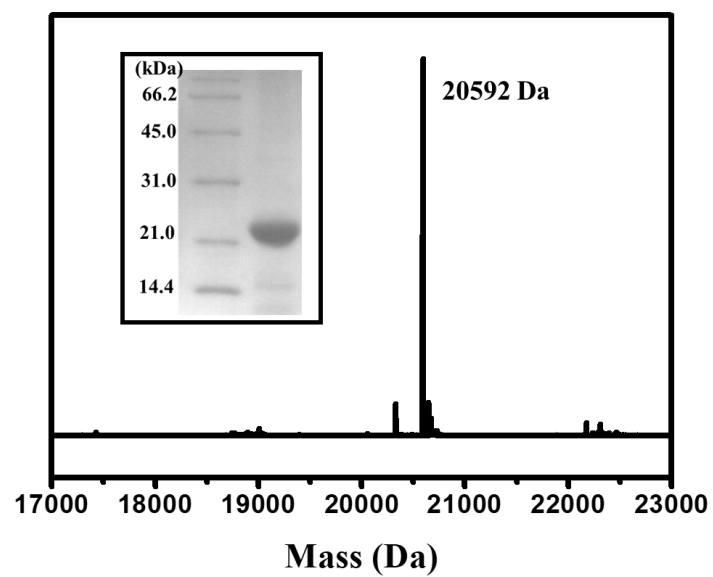

**Supplementary Figure 9. The determination for the MW of mutant VC subunit.** MALDI-TOF-MS results indicated the MW of VC as 20591 Da. SDS-PAGE analysis of mutant VC was shown in the inset. Source data are provided as a Source Data file.

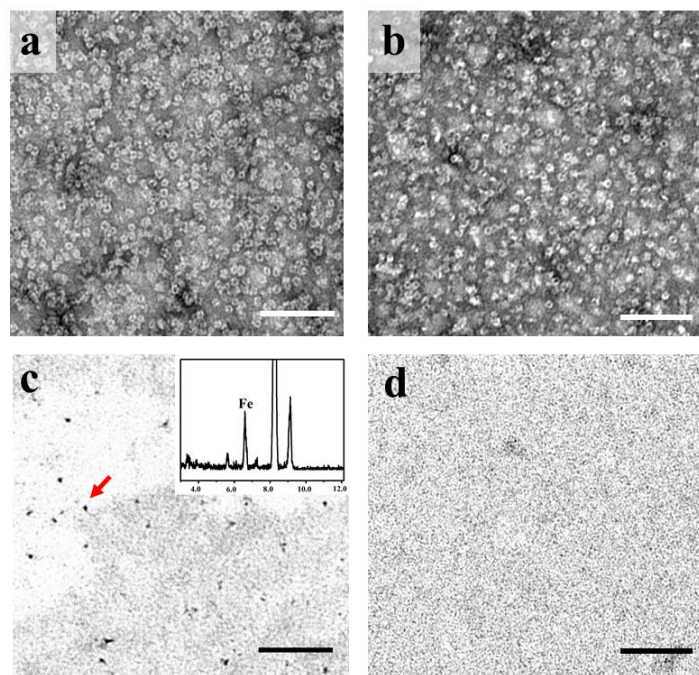

**Supplementary Figure 10. TEM images of mutant  $\nabla$ C and NF-8.** TEM images of mutant (a)  $\nabla$ C and (b) NF-8 upon stained by uranium. Scale bars represent 50 nm. (c) TEM images of iron cores formed when mutant  $\nabla$ C was used as a biotemplate. Energy-dispersive X-ray (EDX) analysis confirmed the presence of iron (inset). (d) No iron core was formed with NF-8 under the same experimental conditions as mutant  $\nabla$ C. No uranium staining was used. Scale bars represent 50 nm.

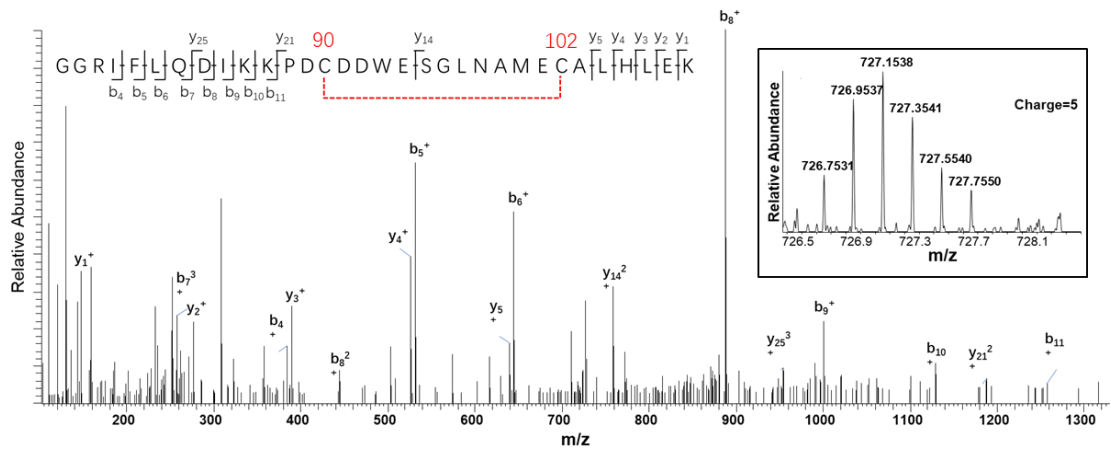

**Supplementary Figure 11. MS/MS spectrum of the intra-subunit S-S.** Inset corresponds to the MS spectrum of peptides.

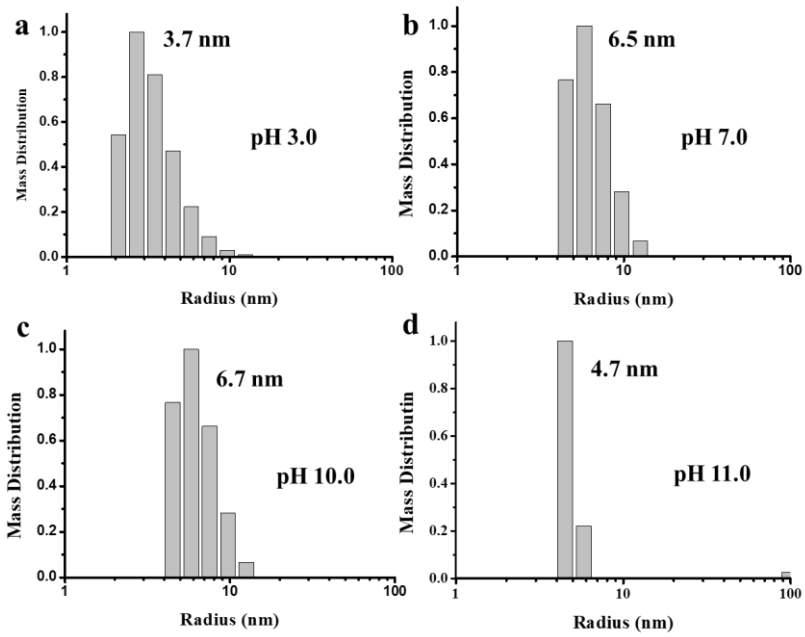

**Supplementary Figure 12. Mass distribution of different particle sizes of 16-mer<sub>Vc</sub>.** The primary species of 16-mer<sub>Vc</sub> in solution over the pH range of 7.0 to 10.0 has a hydrodynamic radius ( $R_H$ ) of 6.5-6.7 nm (**b, c**), corresponding to protein monomer, suggesting that this protein nanocage is stable during this pH range. In contrast, at pH 3.0 or 11.0, the  $R_H$  decreases to 3.7 or 4.7 nm (**a, d**), suggesting that protein disassembly occurs.

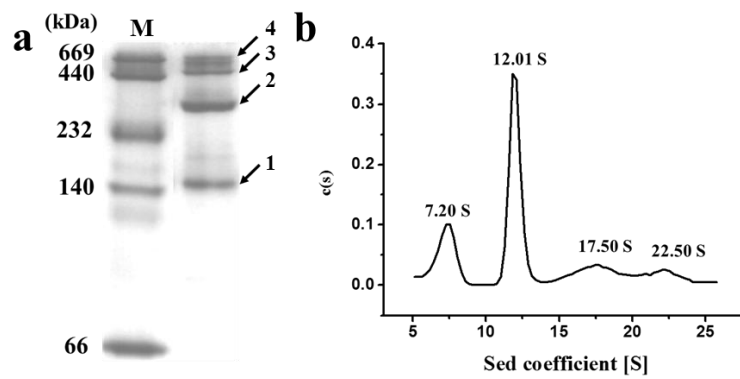

**Supplementary Figure 13. Characterization of mutant  $\Delta 3C-\nabla C$ .** (a) Native PAGE analyses of mutant  $\Delta 3C-\nabla C$  revealed four overexpressed products, three of which were identified to be 24-mer (band 3), 16-mer (band 2), and 8-mer (band 1) assemblies based on their electrophoretic behavior, respectively. Band 4 represents the new protein species which has the largest MW. Source data are provided as a Source Data file. (b) Sedimentation coefficient distribution of four overexpressed products coming from mutant  $\Delta 3C-\nabla C$ .

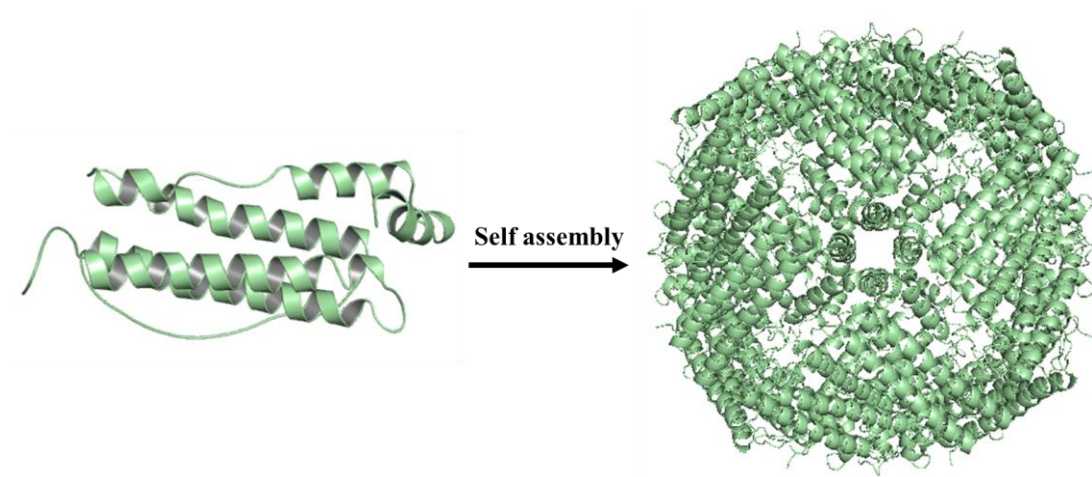

**Supplementary Figure 14. The crystal structure of 24-mer $\Delta_{3C-VC}$ .** This new protein nanocage is a homopolymer which is composed of 24 identical H<sub>7</sub> subunits.

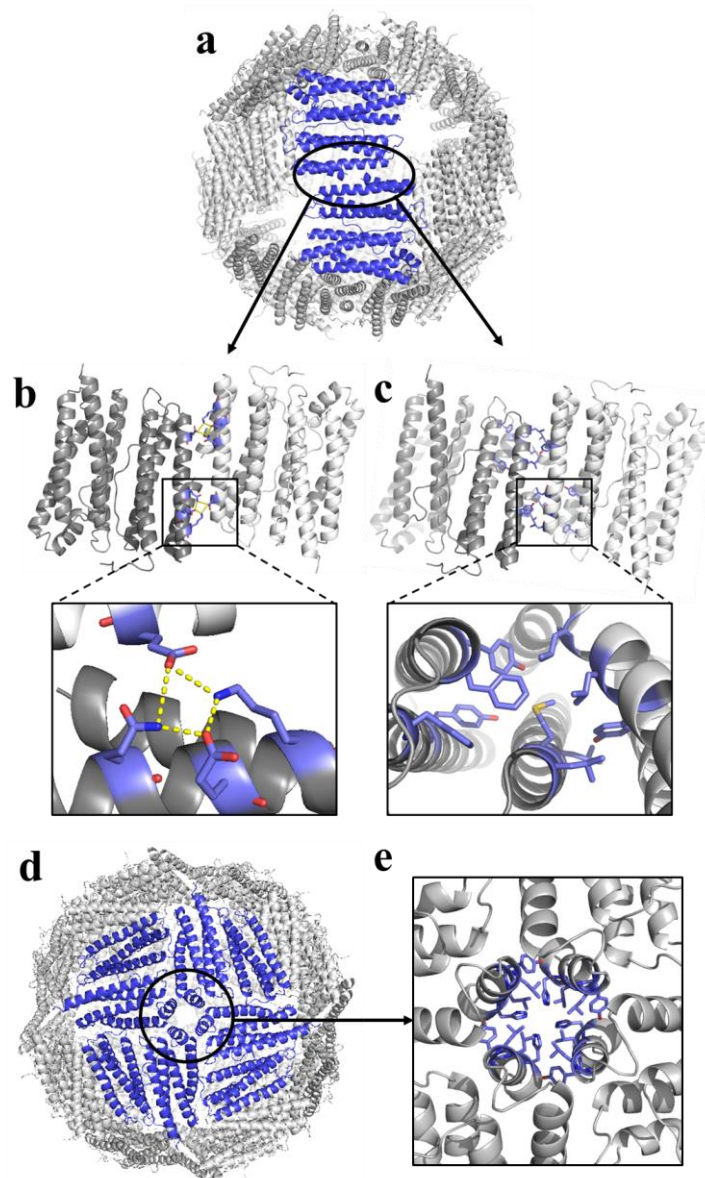

**Supplementary Figure 15. The  $C_2$  interface of 48-mer $_{\Delta 3C-VC}$  nanocage** (a) Protein viewed down the  $C_2$  symmetry axis. The noncovalent interactions at the  $C_2$  interface play an important role in maintaining the structure of 48-mer $_{\Delta 3C-VC}$  nanocage. (b) The salt bridges are formed at the two surface-ends of the  $C_2$  interface. (c) The hydrophobic interactions at the two ends of the  $C_2$  interface. (d) The  $C_4$  interface of 48-mer $_{\Delta 3C-VC}$  nanocage. (e) The main hydrophobic interactions at the  $C_4$  interface are also responsible for protein assembly.



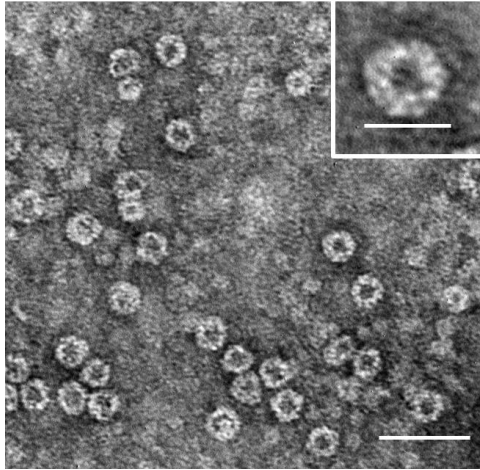

**Supplementary Figure 16. TEM image of the 48-mer<sub>Δ3C-7C</sub> nanocage.** Scale bars represent 50 nm. Inset is the enlarged picture of one nanocage with the exterior diameter as about 17 nm.

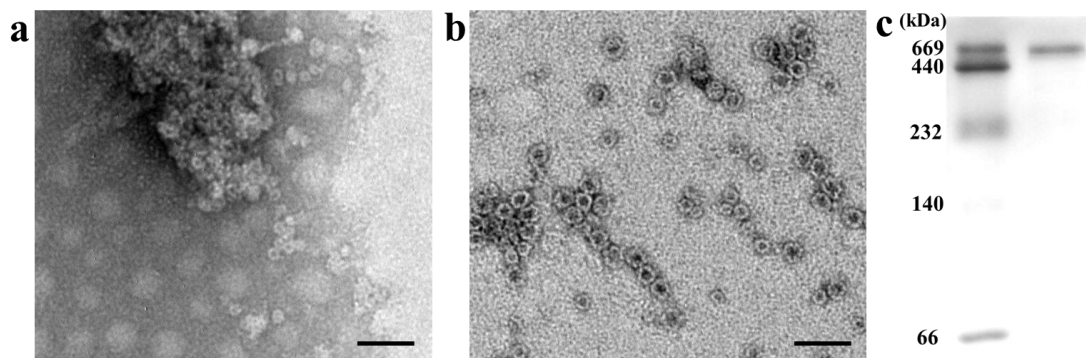

**Supplementary Figure 17. The stability analyses of 48-mer<sub>Δ3C-7C</sub> protein nanocage.** (a) In the absence of Mg<sup>2+</sup>, the 48-mer protein nanocages are unstable in solution, and are degraded into 8-mer protein architectures after 24 h. The formed 8-mer molecules were associated with each other. (b) The morphology of the 48-mer protein nanocages almost keep unchanged in solution in the presence of Mg<sup>2+</sup> after 24 h. Scale bars represent 50 nm. (c) Native PAGE of the 48-mer protein in the presence of Mg<sup>2+</sup>. Source data are provided as a Source Data file.

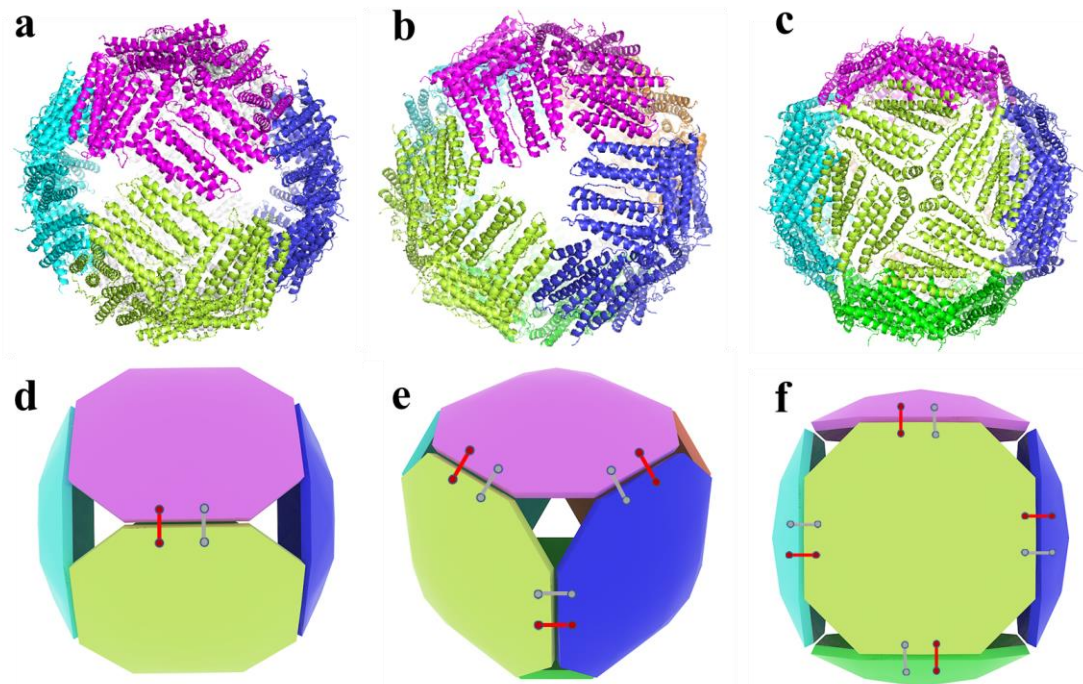

**Supplementary Figure 18. Crystal structure of 48-mer <sub>$\Delta 3C-\nabla C$</sub> .** View of the crystal structure of 48-mer <sub>$\Delta 3C-\nabla C$</sub>  down the two-fold symmetry (a), three-fold symmetry (b) and four-fold symmetry axes (c). Modeling description of 48-mer <sub>$\Delta 3C-\nabla C$</sub>  stabilized by the inter-subunit S-S (grey) and Mg<sup>2+</sup> coordination bonds (red), viewing down the two-fold symmetry (d), three-fold symmetry (e) and four-fold symmetry axes (f).

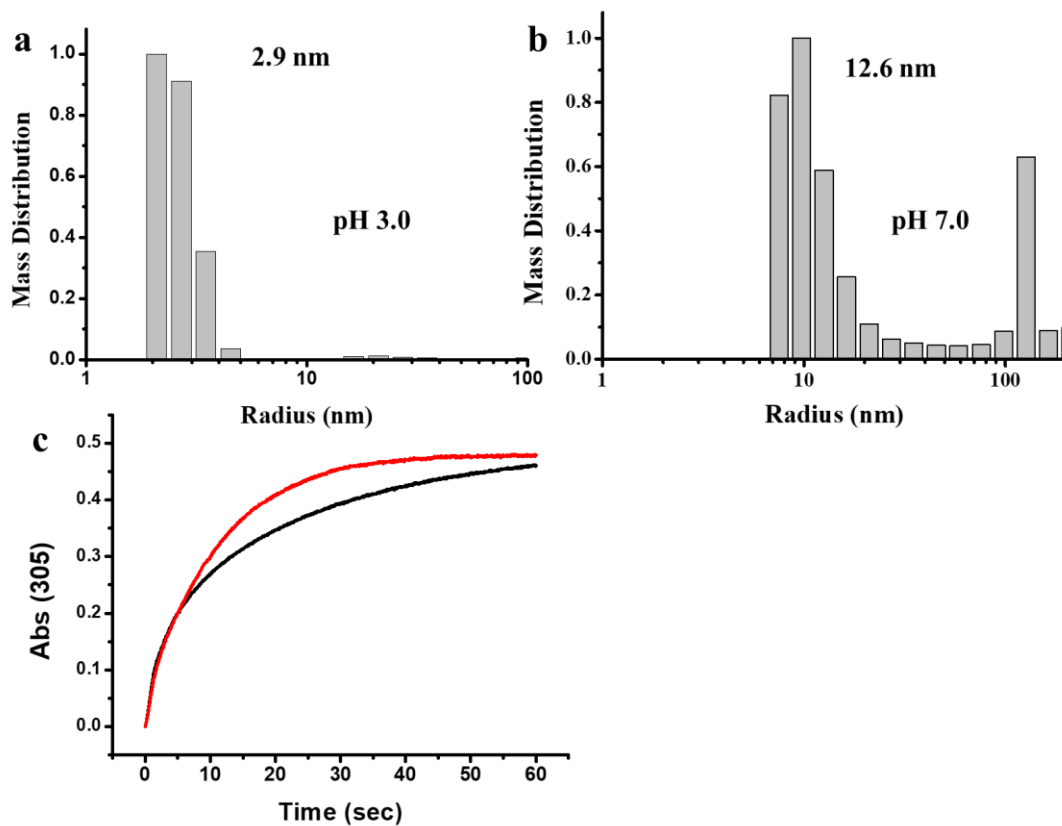

**Supplementary Figure 19. Characterization of 48-mer.** DLS analyses of the 48-mer protein nanocage in the presence of  $Mg^{2+}$  at pH 3.0 (**a**) and 7.0 (**b**). Protein association takes place with the 48-mer protein nanocage at 7.0, which is derived from its larger protein surface as compared to its analogues such as the 24-mer and 16-mer protein nanocages. When pH decreases to 3.0, protein nanocages disassemble into subunits (**a**). (**c**) Kinetic curves of  $Fe^{2+}$  oxidation by  $O_2$  in the presence of native HuHF (red line) and 48-mer (black line), respectively.

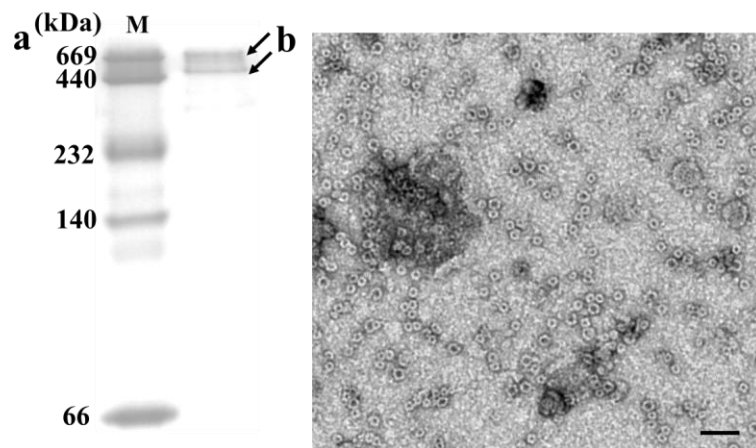

**Supplementary Figure 20.  $Mg^{2+}$  facilitates the formation of 48-mer $_{\Delta 3C-\nabla C}$  during cell culture.**

(a) Native-PAGE analyses of overexpressed protein products upon *E. coli* expressing mutant  $\Delta 3C-\nabla C$  treated with extra magnesium salts. Source data are provided as a Source Data file. (b) TEM image of overexpressed protein products upon *E. coli* expressing mutant  $\Delta 3C-\nabla C$  upon treated with extra magnesium salts. Scale bars represent 50 nm.

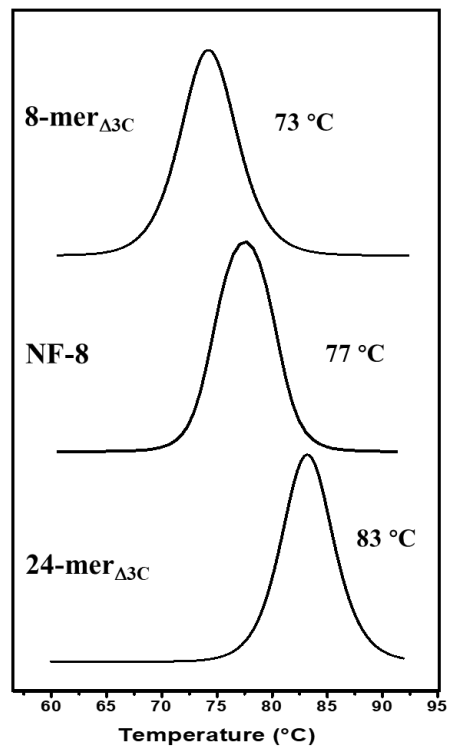

**Supplementary Figure 21. DSC analyses of 8-mer<sub>Δ3C</sub>, NF-8 and 24-mer<sub>Δ3C</sub>.** Disulfide bond and different assembly leads to the difference of melting points.

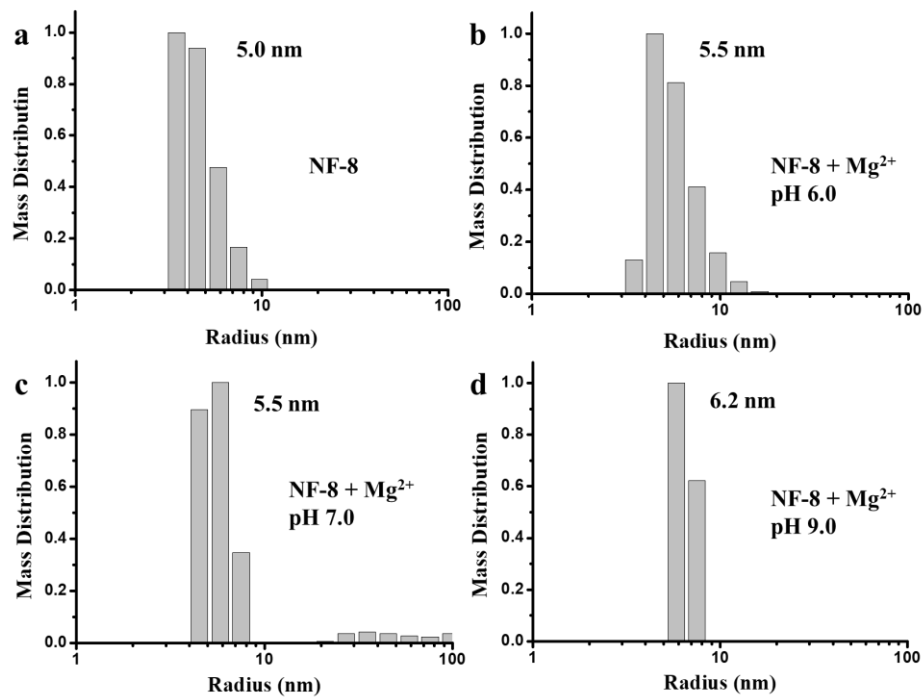

**Supplementary Figure 22. Dynamic light scattering analyses of the 8-mer protein.** One population with a  $R_H$  value of 5.0 nm is evident in the mass distribution curve of NF-8 alone (**a**), which corresponds to NF-8 protein monomer. After NF-8 was treated with  $Mg^{2+}$  at pH 6.0 (**b**), 7.0 (**c**), and 9.0 (**d**), there is also one population occurring in solution, the  $R_H$  of which is 5.5 nm, 5.5 nm, and 6.2 nm, respectively, these values being similar to that of NF-8 alone. These results demonstrated no protein assembly for NF-8 in the presence of  $Mg^{2+}$  *in vitro*.

## Supplementary Tables

**Supplementary Table 1 Crystallization conditions for each crystal.**

|                                 | Crystallization conditions                                                    | pH  |
|---------------------------------|-------------------------------------------------------------------------------|-----|
| <b>24-mer<sub>Δ3C</sub></b>     | 1260 mM (NH <sub>4</sub> ) <sub>2</sub> SO <sub>4</sub> and 100 mM HEPES/NaOH | 7.5 |
| <b>8-mer<sub>Δ3C</sub></b>      | 10% PEG 6000, 5% MPD and 100 mM HEPES/NaOH                                    | 7.5 |
| <b>24-mer<sub>Δ3C-∇C</sub></b>  | 200 mM MgCl <sub>2</sub> , 3.4 M 1,6-Hexanediol and 100 mM TRIS/HCl           | 8.5 |
| <b>48-mer<sub>Δ3C-∇C①</sub></b> | 200 mM NaCl, 35% MPD and 100 mM TRIS/HCl                                      | 8.5 |
| <b>48-mer<sub>Δ3C-∇C②</sub></b> | 200 mM MgCl <sub>2</sub> , 30% PEG 400 and 100 mM TRIS/HCl                    | 7.0 |



**Supplementary Table 2 Crystallographic properties and data collection and model refinement statistics.**

| <b>Parameters</b>    | <b>24-mer<sub>Δ3C</sub></b>           | <b>8-mer<sub>Δ3C</sub></b>                      | <b>24-mer<sub>Δ3C-VC</sub></b>          | <b>48-mer<sub>Δ3C-VC</sub></b>        | <b>48-mer<sub>Δ3C-VC</sub></b>       |
|----------------------|---------------------------------------|-------------------------------------------------|-----------------------------------------|---------------------------------------|--------------------------------------|
| Wavelength (Å)       | 0.9779                                | 0.9779                                          | 0.9779                                  | 0.9779                                | 0.9779                               |
| Space group          | <i>F432</i>                           | <i>P1</i>                                       | <i>P12<sub>1</sub>1</i>                 | <i>F432</i>                           | <i>F432</i>                          |
| Resolution range (Å) | 40.66-3.104                           | 49.16-4.443                                     | 40.87-3.868                             | 48.05-2.699                           | 45.46-2.998                          |
| Unit cell            | 181.844,181.844,<br>181.844, 90,90,90 | 52.304,139.223,139.114,<br>90.102,90.278,90.181 | 117.38,165.364,164.865,<br>90,94.002,90 | 235.374, 235.374,<br>235.374,90,90,90 | 236.229,236.229,<br>236.229,90,90,90 |
| Total reflections    | 2056602                               | 732485                                          | 3809615                                 | 5721563                               | 5690958                              |
| Unique reflections   | 5057 (495)                            | 21483 (1562)                                    | 54320 (4634)                            | 15937 (1549)                          | 11867 (1144)                         |
| Completeness (%)     | 99                                    | 87                                              | 92                                      | 100                                   | 100                                  |
| Mean I/sigma (I)     | 4.7                                   | 2.3                                             | 2.7                                     | 8.1                                   | 6.5                                  |
| Wilson B-factor      | 58.02                                 | 127.47                                          | 66.40                                   | 38.88                                 | 58.73                                |
| CC1/2                | 0.996                                 | 1.001                                           | 0.921                                   | 1.004                                 | 0.999                                |
| Reflections used in  | 5037 (495)                            | 21166 (1538)                                    | 54283 (4630)                            | 15934 (1549)                          | 11865 (1144)                         |
| Reflections used for | 263 (24)                              | 882 (58)                                        | 2730 (243)                              | 792 (83)                              | 565 (65)                             |
| R-work               | 0.1971 (0.2199)                       | 0.2066 (0.2742)                                 | 0.2432 (0.2497)                         | 0.1998 (0.2654)                       | 0.1914 (0.2423)                      |
| R-free               | 0.2750 (0.3190)                       | 0.2761 (0.4367)                                 | 0.3279 (0.3671)                         | 0.2435 (0.3681)                       | 0.2456 (0.3189)                      |
| non-hydrogen atoms   | 1367                                  | 20155                                           | 32527                                   | 2550                                  | 2515                                 |
| macromolecules       | 1363                                  | 20122                                           | 32516                                   | 2496                                  | 2494                                 |
| Ligands              | 1                                     | 16                                              | 0                                       | 1                                     | 3                                    |
| Protein residues     | 166                                   | 2440                                            | 3984                                    | 303                                   | 303                                  |
| RMS (bonds)          | 0.011                                 | 0.005                                           | 0.014                                   | 0.009                                 | 0.009                                |
| RMS (angles)         | 1.24                                  | 0.81                                            | 1.54                                    | 1.00                                  | 0.96                                 |
| Ramachandran         | 95                                    | 87                                              | 81                                      | 94                                    | 94                                   |
| Ramachandran         | 2.4                                   | 9.5                                             | 14                                      | 5.4                                   | 4.7                                  |
| Ramachandran         | 3                                     | 3.2                                             | 5.3                                     | 1                                     | 1                                    |
| Rotamer outliers (%) | 1.4                                   | 6.5                                             | 3.7                                     | 5.6                                   | 4.5                                  |

**Supplementary Table 3 Primer sequences of NF-8 mutants.**

| <b>Site</b>  | <b>Primer sequence</b>                                                                 |
|--------------|----------------------------------------------------------------------------------------|
| <b>C90A</b>  | 5'GACATCAAAAACCGGACGCGGATGATTGGGAATCTGGT<br>3'ACCAGATTCCCAATCATCCGCGTCCGGTTTTTTGATGTC  |
| <b>C102A</b> | 5'GGTCTGAACGCAATGGAAGCAGCGCTGCATCTGGAGAAA<br>3'TTTCTCCAGATGCAGCGCTGCTTCCATTGCGTTCAGACC |
| <b>C130A</b> | 5'AAAAACGATCCGCATCTGGCCGATTCATCGAAACCCAC<br>3'GTGGGTTTCGATGAAATCGGCCAGATGCGGATCGTTTTT  |
| <b>D144C</b> | 5'CTGATCAAAGAACTGGGCTGCCACGTTACCAATCTGCGT<br>3'ACGCAGATTGGTAACGTGGCAGCCCAGTTCTTTGATCAG |
